# Supplementary material
Source: publisher figshare collection journal article supplement (https://acs.figshare.com/ndownloader/files/5186407)
Supplement: Supplementary file 1 [file 5186407]

data_global

_publ_section_title
;
  ACS Publications.

  We are sorry, but the Supporting Information file you have requested is not
  available. You are receiving this replacement file due to the unintentional
  generation of several Supporting Info links on the website.  We are
  currently working to correct this problem, and apologize for any
  inconvenience.
;
loop_
 _publ_author_name
 _publ_author_address
     'ACS Publications'
;     pubshelp@acs.org
;
 
data_NotAvailable

loop_
_chemical_name_common
; We are sorry, but the Supporting Information file you have requested is not
 available. You are receiving this replacement file due to the unintentional
 generation of several Supporting Info links on the website.  We are
 currently working to correct this problem, and apologize for any
 inconvenience.
;

#_chemical_formula_sum             'H2'
#_chemical_formula_weight          2
 
loop_
 _atom_type_symbol
 _atom_type_description
 _atom_type_scat_dispersion_real
 _atom_type_scat_dispersion_imag
 _atom_type_scat_source
 'C'  'C'   0.0181   0.0091
 'International Tables Vol C Tables 4.2.6.8 and 6.1.1.4'
 'H'  'H'   0.0000   0.0000
 'International Tables Vol C Tables 4.2.6.8 and 6.1.1.4'
 'Br'  'Br'  -0.6763   1.2805
 'International Tables Vol C Tables 4.2.6.8 and 6.1.1.4'

_symmetry_cell_setting            Monoclinic
_symmetry_space_group_name_H-M    C2/c

loop_
 _symmetry_equiv_pos_as_xyz
 'x, y, z'
 '-x, y, -z+1/2'
 'x+1/2, y+1/2, z'
 '-x+1/2, y+1/2, -z+1/2'
 '-x, -y, -z'
 'x, -y, z-1/2'
 '-x+1/2, -y+1/2, -z'
 'x+1/2, -y+1/2, z-1/2'

_cell_length_a                    32.902(3)
_cell_length_b                    3.9832(6)
_cell_length_c                    19.1281(18)
_cell_angle_alpha                 90.00
_cell_angle_beta                  105.010(8)
_cell_angle_gamma                 90.00
_cell_volume                      2421.3(5)
_cell_formula_units_Z             8
_cell_measurement_temperature     223(2)
_cell_measurement_reflns_used     35
_cell_measurement_theta_min       16.93
_cell_measurement_theta_max       44.69


loop_
 _atom_site_label
 _atom_site_type_symbol
 _atom_site_fract_x
 _atom_site_fract_y
 _atom_site_fract_z
 _atom_site_U_iso_or_equiv
 _atom_site_adp_type
 _atom_site_occupancy
 _atom_site_symmetry_multiplicity
 _atom_site_calc_flag
 _atom_site_refinement_flags
 _atom_site_disorder_assembly
 _atom_site_disorder_group
C1 C 0.37410(13) 0.2694(12) 0.2815(3) 0.0382(11) Uani 1 1 d . . .
C1A C 0.38133(13) 0.1021(12) 0.3501(3) 0.0402(11) Uani 1 1 d . . .
C1B C 0.38871(12) -0.0244(12) 0.4074(3) 0.0401(11) Uani 1 1 d . . .

loop_
 _atom_site_aniso_label
 _atom_site_aniso_U_11
 _atom_site_aniso_U_22
 _atom_site_aniso_U_33
 _atom_site_aniso_U_23
 _atom_site_aniso_U_13
 _atom_site_aniso_U_12
C1 0.040(2) 0.038(3) 0.035(3) -0.008(2) 0.0071(19) -0.0038(18)
C1A 0.037(2) 0.043(3) 0.040(3) -0.010(2) 0.0093(19) -0.005(2)
C1B 0.035(2) 0.049(3) 0.037(3) -0.005(2) 0.0092(19) 0.000(2)


loop_
 _geom_bond_atom_site_label_1
 _geom_bond_atom_site_label_2
 _geom_bond_distance
 _geom_bond_site_symmetry_2
 _geom_bond_publ_flag
C1 C1A 1.436(7) . ?
C1A C1B 1.174(7) . ?


#====END
